# Supplementary material for: N-doping of fullerene using 1,3,5-trimethylhexahydro-1,3,5-triazine as an electron transport layer for nonfullerene organic solar cells
Source: Royal Society of Chemistry journal article supplement (doi:10.1039/c9se01015g), 2020-01-01
Supplement: c9se01015g1.pdf [file c9se01015g1.pdf]

## Supporting information

### **N-doping of fullerene using 1,3,5-trimethylhexahydro-1,3,5-triazine as an electron transporting layer for nonfullerene organic solar cells**

*Jing Li, Fei Qin, Wenwu Zeng, Lulu Sun, Wen Wang, and Yinhua Zhou\**

Wuhan National Laboratory for Optoelectronics, Huazhong University of Science and  
Technology, Wuhan 430074, P. R. China

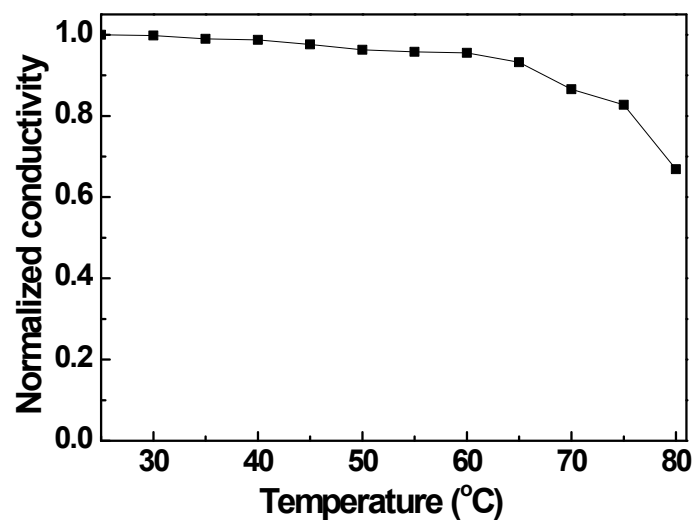

**Figure S1.** Normalized conductivity of the 5 wt.% doped PCBM films after continuous annealing at different temperature. The sample was annealed for 10 min at each temperature.

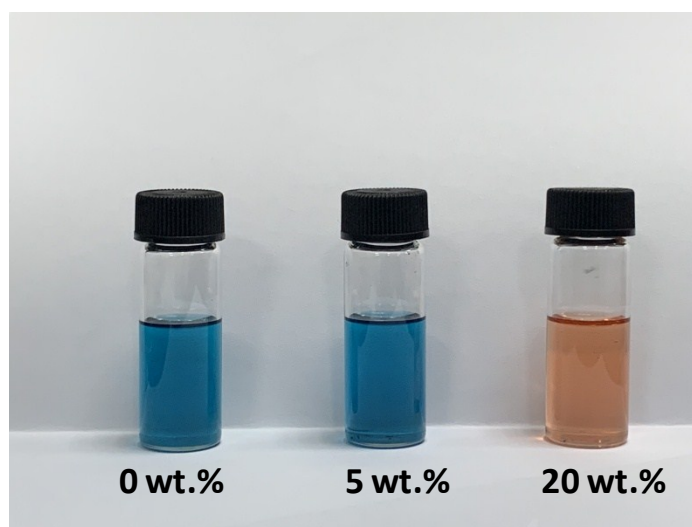

**Figure S2.** IT-4F (20  $\mu\text{g}/\text{mL}$ ) mixed with doped PCBM solutions (10  $\mu\text{g}/\text{mL}$ ) with different n-doping ratios. The volume ratio of the two solutions are 10:1 (IT-4F: doped PCBM). The doping ratio of THMT to PCBM is 0, 5, 20 wt.%, as shown in the figure. The picture was taken after the solutions were mixed for 10 min.
